# Supplementary material for: Graphitic carbon nitride supported Ni–Co dual-atom catalysts beyond Ni1(Co1) single-atom catalysts for hydrogen production: a density functional theory study
Source: Royal Society of Chemistry journal article supplement (doi:10.1039/d4cp00616j), 2024-01-01
Supplement: d4cp00616j1.pdf [file d4cp00616j1.pdf]

## Supporting Information

Graphitic carbon nitride supported Ni-Co dual-atom catalysts beyond  
Ni<sub>1</sub>(Co<sub>1</sub>) single-atom catalysts for hydrogen production: A density  
functional theory study

Yue He, Furui Chen, Gang Zhou\*

School of Science, Hubei University of Technology, Wuhan 430068, People's  
Republic of China

\**E-mail: 995372896@qq.com*

Following the assumption of the inverted mold proposed here, the defect formation energy,  $E_{forming}$ , for a  $C_3N_1$  fragment in the g-CN layer is defined as below,

$$E_{forming} = E(C_3N_4) + E(Frag - C_3N_1) - E(CN)$$

where  $E(C_3N_4)$ ,  $E(Frag - C_3N_1)$  and  $E(CN)$  are the total energies of g- $C_3N_4$  layer, a  $C_3N_1$  fragment and g-CN layer, respectively.

Coordinates of five important structures (.cif), containing pure Co-Ni/*gh*-C<sub>3</sub>N<sub>4</sub> (Fig. 1), H-adsorbed Co-Ni/*gh*-C<sub>3</sub>N<sub>4</sub> (1H, 2H and 3H adsorption scenarios in Fig. 2), and H<sub>2</sub> adsorption on Co-Ni/*gh*-C<sub>3</sub>N<sub>4</sub> (Fig. 5) are illustrated below.

### Co-Ni/*gh*-C<sub>3</sub>N<sub>4</sub>

=====

# CRYSTAL DATA

#-----

data\_VESTA\_phase\_1

```

_chemical_name_common          'Co-Ni/gh-C3N4'
_cell_length_a                 14.26550
_cell_length_b                 14.26550
_cell_length_c                 20.00000
_cell_angle_alpha              90
_cell_angle_beta               90
_cell_angle_gamma              120
_space_group_name_H-M_alt      'P 1'
_space_group_IT_number         1

```

```

loop_
_space_group_symop_operation_xyz
  'x, y, z'

```

```

loop_
  _atom_site_label
  _atom_site_occupancy
  _atom_site_fract_x
  _atom_site_fract_y
  _atom_site_fract_z
  _atom_site_adp_type
  _atom_site_B_iso_or_equiv
  _atom_site_type_symbol
N1          1.0    0.002462    0.004079    0.174042    Biso  1.000000 N
N2          1.0    0.153857    0.482664    0.218987    Biso  1.000000 N
N3          1.0    0.324938    0.494695    0.207750    Biso  1.000000 N
N4          1.0    0.001425    0.170528    0.146783    Biso  1.000000 N
N5          1.0    0.169472    0.172517    0.150115    Biso  1.000000 N
N6          1.0    0.007827    0.340628    0.144807    Biso  1.000000 N
N7          1.0    0.163990    0.330280    0.179028    Biso  1.000000 N

```

|     |     |          |          |          |      |            |
|-----|-----|----------|----------|----------|------|------------|
| N8  | 1.0 | 0.333822 | 0.340709 | 0.158525 | Biso | 1.000000 N |
| N9  | 1.0 | 0.499515 | 0.998237 | 0.213011 | Biso | 1.000000 N |
| N10 | 1.0 | 0.657391 | 0.488359 | 0.157773 | Biso | 1.000000 N |
| N11 | 1.0 | 0.825144 | 0.493115 | 0.157165 | Biso | 1.000000 N |
| N12 | 1.0 | 0.508044 | 0.172764 | 0.238203 | Biso | 1.000000 N |
| N13 | 1.0 | 0.664755 | 0.167661 | 0.193042 | Biso | 1.000000 N |
| N14 | 1.0 | 0.506949 | 0.339240 | 0.226691 | Biso | 1.000000 N |
| N15 | 1.0 | 0.664355 | 0.331972 | 0.192886 | Biso | 1.000000 N |
| N16 | 1.0 | 0.829976 | 0.332902 | 0.191659 | Biso | 1.000000 N |
| N17 | 1.0 | 0.997317 | 0.500748 | 0.178542 | Biso | 1.000000 N |
| N18 | 1.0 | 0.168282 | 0.001199 | 0.193186 | Biso | 1.000000 N |
| N19 | 1.0 | 0.333975 | 0.000103 | 0.194426 | Biso | 1.000000 N |
| N20 | 1.0 | 0.010181 | 0.674242 | 0.148317 | Biso | 1.000000 N |
| N21 | 1.0 | 0.155858 | 0.672320 | 0.218938 | Biso | 1.000000 N |
| N22 | 1.0 | 0.010404 | 0.841038 | 0.144561 | Biso | 1.000000 N |
| N23 | 1.0 | 0.167971 | 0.837287 | 0.184901 | Biso | 1.000000 N |
| N24 | 1.0 | 0.324121 | 0.833021 | 0.229849 | Biso | 1.000000 N |
| N25 | 1.0 | 0.500939 | 0.501837 | 0.188450 | Biso | 1.000000 N |
| N26 | 1.0 | 0.665679 | 0.992536 | 0.227527 | Biso | 1.000000 N |
| N27 | 1.0 | 0.836793 | 0.002622 | 0.212896 | Biso | 1.000000 N |
| N28 | 1.0 | 0.515164 | 0.675663 | 0.165069 | Biso | 1.000000 N |
| N29 | 1.0 | 0.671838 | 0.670651 | 0.207921 | Biso | 1.000000 N |
| N30 | 1.0 | 0.507540 | 0.833809 | 0.178356 | Biso | 1.000000 N |
| N31 | 1.0 | 0.676619 | 0.838876 | 0.185095 | Biso | 1.000000 N |
| N32 | 1.0 | 0.838825 | 0.836489 | 0.203620 | Biso | 1.000000 N |
| C1  | 1.0 | 0.059933 | 0.120610 | 0.157720 | Biso | 1.000000 C |
| C2  | 1.0 | 0.052423 | 0.277486 | 0.155708 | Biso | 1.000000 C |
| C3  | 1.0 | 0.224673 | 0.278293 | 0.161223 | Biso | 1.000000 C |
| C4  | 1.0 | 0.054097 | 0.437965 | 0.179696 | Biso | 1.000000 C |
| C5  | 1.0 | 0.215221 | 0.435650 | 0.202106 | Biso | 1.000000 C |
| C6  | 1.0 | 0.382564 | 0.442871 | 0.184228 | Biso | 1.000000 C |
| C7  | 1.0 | 0.560623 | 0.120208 | 0.214605 | Biso | 1.000000 C |
| C8  | 1.0 | 0.555679 | 0.279017 | 0.220039 | Biso | 1.000000 C |
| C9  | 1.0 | 0.721881 | 0.276004 | 0.192627 | Biso | 1.000000 C |
| C10 | 1.0 | 0.558007 | 0.438015 | 0.190928 | Biso | 1.000000 C |
| C11 | 1.0 | 0.717826 | 0.441298 | 0.168541 | Biso | 1.000000 C |
| C12 | 1.0 | 0.877383 | 0.439297 | 0.175535 | Biso | 1.000000 C |
| C13 | 1.0 | 0.055635 | 0.620548 | 0.180446 | Biso | 1.000000 C |
| C14 | 1.0 | 0.058261 | 0.782033 | 0.158098 | Biso | 1.000000 C |
| C15 | 1.0 | 0.218650 | 0.782245 | 0.210781 | Biso | 1.000000 C |
| C16 | 1.0 | 0.063359 | 0.944763 | 0.170660 | Biso | 1.000000 C |
| C17 | 1.0 | 0.225898 | 0.951356 | 0.190838 | Biso | 1.000000 C |
| C18 | 1.0 | 0.381285 | 0.941740 | 0.211663 | Biso | 1.000000 C |
| C19 | 1.0 | 0.567480 | 0.620777 | 0.186763 | Biso | 1.000000 C |

|     |     |          |          |          |      |          |    |
|-----|-----|----------|----------|----------|------|----------|----|
| C20 | 1.0 | 0.567289 | 0.784750 | 0.174994 | Biso | 1.000000 | C  |
| C21 | 1.0 | 0.731700 | 0.779147 | 0.199624 | Biso | 1.000000 | C  |
| C22 | 1.0 | 0.561032 | 0.939537 | 0.206344 | Biso | 1.000000 | C  |
| C23 | 1.0 | 0.729229 | 0.950051 | 0.209935 | Biso | 1.000000 | C  |
| C24 | 1.0 | 0.887329 | 0.945411 | 0.195807 | Biso | 1.000000 | C  |
| Co1 | 1.0 | 0.230334 | 0.615239 | 0.274039 | Biso | 1.000000 | Co |
| Ni1 | 1.0 | 0.375752 | 0.645469 | 0.199711 | Biso | 1.000000 | Ni |

## 1H-adsorption on Co-Ni/*gh*-C<sub>3</sub>N<sub>4</sub>

=====

# CRYSTAL DATA

#-----

data\_VESTA\_phase\_1

|                           |                                           |
|---------------------------|-------------------------------------------|
| _chemical_name_common     | '1H-adsorption on Co-Ni/ <i>gh</i> -C3N4' |
| _cell_length_a            | 14.26550                                  |
| _cell_length_b            | 14.26550                                  |
| _cell_length_c            | 20.00000                                  |
| _cell_angle_alpha         | 90                                        |
| _cell_angle_beta          | 90                                        |
| _cell_angle_gamma         | 120                                       |
| _space_group_name_H-M_alt | 'P 1'                                     |
| _space_group_IT_number    | 1                                         |

loop\_

|                                  |           |
|----------------------------------|-----------|
| _space_group_symop_operation_xyz | 'x, y, z' |
|----------------------------------|-----------|

loop\_

|                           |     |           |          |          |      |          |   |
|---------------------------|-----|-----------|----------|----------|------|----------|---|
| _atom_site_label          |     |           |          |          |      |          |   |
| _atom_site_occupancy      |     |           |          |          |      |          |   |
| _atom_site_fract_x        |     |           |          |          |      |          |   |
| _atom_site_fract_y        |     |           |          |          |      |          |   |
| _atom_site_fract_z        |     |           |          |          |      |          |   |
| _atom_site_adp_type       |     |           |          |          |      |          |   |
| _atom_site_B_iso_or_equiv |     |           |          |          |      |          |   |
| _atom_site_type_symbol    |     |           |          |          |      |          |   |
| N1                        | 1.0 | -0.001527 | 0.002476 | 0.170317 | Biso | 1.000000 | N |
| N2                        | 1.0 | 0.156511  | 0.485243 | 0.215404 | Biso | 1.000000 | N |

|     |     |          |           |          |      |            |
|-----|-----|----------|-----------|----------|------|------------|
| N3  | 1.0 | 0.322853 | 0.484262  | 0.218693 | Biso | 1.000000 N |
| N4  | 1.0 | 0.000106 | 0.170891  | 0.143184 | Biso | 1.000000 N |
| N5  | 1.0 | 0.166732 | 0.170426  | 0.147279 | Biso | 1.000000 N |
| N6  | 1.0 | 0.008503 | 0.341768  | 0.142260 | Biso | 1.000000 N |
| N7  | 1.0 | 0.163597 | 0.330014  | 0.175575 | Biso | 1.000000 N |
| N8  | 1.0 | 0.332576 | 0.337609  | 0.155978 | Biso | 1.000000 N |
| N9  | 1.0 | 0.498322 | 0.001881  | 0.212185 | Biso | 1.000000 N |
| N10 | 1.0 | 0.657234 | 0.490303  | 0.160360 | Biso | 1.000000 N |
| N11 | 1.0 | 0.825447 | 0.495445  | 0.158431 | Biso | 1.000000 N |
| N12 | 1.0 | 0.508408 | 0.174880  | 0.239065 | Biso | 1.000000 N |
| N13 | 1.0 | 0.662505 | 0.168902  | 0.187639 | Biso | 1.000000 N |
| N14 | 1.0 | 0.507780 | 0.340900  | 0.229870 | Biso | 1.000000 N |
| N15 | 1.0 | 0.664660 | 0.333949  | 0.193356 | Biso | 1.000000 N |
| N16 | 1.0 | 0.829300 | 0.333182  | 0.185007 | Biso | 1.000000 N |
| N17 | 1.0 | 0.998143 | 0.501816  | 0.174257 | Biso | 1.000000 N |
| N18 | 1.0 | 0.163120 | -0.000646 | 0.193684 | Biso | 1.000000 N |
| N19 | 1.0 | 0.331010 | 0.002767  | 0.195334 | Biso | 1.000000 N |
| N20 | 1.0 | 0.010446 | 0.674605  | 0.141960 | Biso | 1.000000 N |
| N21 | 1.0 | 0.156270 | 0.673161  | 0.212837 | Biso | 1.000000 N |
| N22 | 1.0 | 0.008541 | 0.840422  | 0.139444 | Biso | 1.000000 N |
| N23 | 1.0 | 0.167293 | 0.838282  | 0.178713 | Biso | 1.000000 N |
| N24 | 1.0 | 0.323290 | 0.835839  | 0.225556 | Biso | 1.000000 N |
| N25 | 1.0 | 0.498425 | 0.499710  | 0.192475 | Biso | 1.000000 N |
| N26 | 1.0 | 0.665726 | -0.003331 | 0.226727 | Biso | 1.000000 N |
| N27 | 1.0 | 0.833481 | 0.002056  | 0.208752 | Biso | 1.000000 N |
| N28 | 1.0 | 0.503358 | 0.672854  | 0.186316 | Biso | 1.000000 N |
| N29 | 1.0 | 0.667633 | 0.670183  | 0.205070 | Biso | 1.000000 N |
| N30 | 1.0 | 0.504060 | 0.837687  | 0.184577 | Biso | 1.000000 N |
| N31 | 1.0 | 0.669746 | 0.837707  | 0.187404 | Biso | 1.000000 N |
| N32 | 1.0 | 0.833497 | 0.835180  | 0.199204 | Biso | 1.000000 N |
| C1  | 1.0 | 0.057228 | 0.119483  | 0.154466 | Biso | 1.000000 C |
| C2  | 1.0 | 0.052404 | 0.277891  | 0.152324 | Biso | 1.000000 C |
| C3  | 1.0 | 0.223117 | 0.276284  | 0.158680 | Biso | 1.000000 C |
| C4  | 1.0 | 0.056095 | 0.439489  | 0.176287 | Biso | 1.000000 C |
| C5  | 1.0 | 0.214993 | 0.434447  | 0.203075 | Biso | 1.000000 C |
| C6  | 1.0 | 0.380092 | 0.436890  | 0.188049 | Biso | 1.000000 C |
| C7  | 1.0 | 0.559433 | 0.122159  | 0.212760 | Biso | 1.000000 C |
| C8  | 1.0 | 0.556421 | 0.281050  | 0.221559 | Biso | 1.000000 C |
| C9  | 1.0 | 0.721089 | 0.277083  | 0.188733 | Biso | 1.000000 C |
| C10 | 1.0 | 0.558126 | 0.439402  | 0.193877 | Biso | 1.000000 C |
| C11 | 1.0 | 0.718190 | 0.443527  | 0.170162 | Biso | 1.000000 C |
| C12 | 1.0 | 0.877657 | 0.440359  | 0.172422 | Biso | 1.000000 C |
| C13 | 1.0 | 0.056457 | 0.621652  | 0.174762 | Biso | 1.000000 C |
| C14 | 1.0 | 0.057907 | 0.782448  | 0.152156 | Biso | 1.000000 C |

|     |     |          |          |          |      |          |    |
|-----|-----|----------|----------|----------|------|----------|----|
| C15 | 1.0 | 0.218754 | 0.783551 | 0.205026 | Biso | 1.000000 | C  |
| C16 | 1.0 | 0.059641 | 0.943188 | 0.167875 | Biso | 1.000000 | C  |
| C17 | 1.0 | 0.222917 | 0.951713 | 0.189276 | Biso | 1.000000 | C  |
| C18 | 1.0 | 0.379537 | 0.944726 | 0.210172 | Biso | 1.000000 | C  |
| C19 | 1.0 | 0.560971 | 0.619244 | 0.194212 | Biso | 1.000000 | C  |
| C20 | 1.0 | 0.557852 | 0.783143 | 0.185139 | Biso | 1.000000 | C  |
| C21 | 1.0 | 0.725984 | 0.778880 | 0.198241 | Biso | 1.000000 | C  |
| C22 | 1.0 | 0.559967 | 0.942949 | 0.207231 | Biso | 1.000000 | C  |
| C23 | 1.0 | 0.725449 | 0.950366 | 0.208628 | Biso | 1.000000 | C  |
| C24 | 1.0 | 0.882815 | 0.944164 | 0.191952 | Biso | 1.000000 | C  |
| Co1 | 1.0 | 0.230043 | 0.620694 | 0.278768 | Biso | 1.000000 | Co |
| Ni1 | 1.0 | 0.388340 | 0.626899 | 0.266369 | Biso | 1.000000 | Ni |
| H1  | 1.0 | 0.318295 | 0.622080 | 0.348238 | Biso | 1.000000 | H  |

## 2H-adsorption on Co-Ni/*gh*-C<sub>3</sub>N<sub>4</sub>

=====

# CRYSTAL DATA

#-----

data\_VESTA\_phase\_1

|                           |                                           |
|---------------------------|-------------------------------------------|
| _chemical_name_common     | '2H-adsorption on Co-Ni/ <i>gh</i> -C3N4' |
| _cell_length_a            | 14.26550                                  |
| _cell_length_b            | 14.26550                                  |
| _cell_length_c            | 20.00000                                  |
| _cell_angle_alpha         | 90                                        |
| _cell_angle_beta          | 90                                        |
| _cell_angle_gamma         | 120                                       |
| _space_group_name_H-M_alt | 'P 1'                                     |
| _space_group_IT_number    | 1                                         |

loop\_

|                                  |           |
|----------------------------------|-----------|
| _space_group_symop_operation_xyz | 'x, y, z' |
|----------------------------------|-----------|

loop\_

|                      |  |
|----------------------|--|
| _atom_site_label     |  |
| _atom_site_occupancy |  |
| _atom_site_fract_x   |  |
| _atom_site_fract_y   |  |

| <u>_atom_site_fract_z</u> | <u>_atom_site_adp_type</u> | <u>_atom_site_B_iso_or_equiv</u> | <u>_atom_site_type_symbol</u> |          |      |          |   |
|---------------------------|----------------------------|----------------------------------|-------------------------------|----------|------|----------|---|
| N1                        | 1.0                        | 0.002057                         | 0.003057                      | 0.164408 | Biso | 1.000000 | N |
| N2                        | 1.0                        | 0.159355                         | 0.484944                      | 0.212486 | Biso | 1.000000 | N |
| N3                        | 1.0                        | 0.325133                         | 0.483503                      | 0.216124 | Biso | 1.000000 | N |
| N4                        | 1.0                        | 0.003001                         | 0.171460                      | 0.137983 | Biso | 1.000000 | N |
| N5                        | 1.0                        | 0.169864                         | 0.171392                      | 0.141593 | Biso | 1.000000 | N |
| N6                        | 1.0                        | 0.009983                         | 0.341573                      | 0.140378 | Biso | 1.000000 | N |
| N7                        | 1.0                        | 0.166552                         | 0.330566                      | 0.170563 | Biso | 1.000000 | N |
| N8                        | 1.0                        | 0.335907                         | 0.338069                      | 0.152169 | Biso | 1.000000 | N |
| N9                        | 1.0                        | 0.501460                         | 0.001732                      | 0.213212 | Biso | 1.000000 | N |
| N10                       | 1.0                        | 0.659335                         | 0.488883                      | 0.159815 | Biso | 1.000000 | N |
| N11                       | 1.0                        | 0.827831                         | 0.494700                      | 0.159478 | Biso | 1.000000 | N |
| N12                       | 1.0                        | 0.510441                         | 0.174156                      | 0.240038 | Biso | 1.000000 | N |
| N13                       | 1.0                        | 0.665613                         | 0.168885                      | 0.190565 | Biso | 1.000000 | N |
| N14                       | 1.0                        | 0.509361                         | 0.339935                      | 0.229085 | Biso | 1.000000 | N |
| N15                       | 1.0                        | 0.667029                         | 0.333360                      | 0.194847 | Biso | 1.000000 | N |
| N16                       | 1.0                        | 0.832122                         | 0.333141                      | 0.189221 | Biso | 1.000000 | N |
| N17                       | 1.0                        | 0.000560                         | 0.501275                      | 0.176569 | Biso | 1.000000 | N |
| N18                       | 1.0                        | 0.167986                         | 0.001023                      | 0.187035 | Biso | 1.000000 | N |
| N19                       | 1.0                        | 0.334879                         | 0.002440                      | 0.191912 | Biso | 1.000000 | N |
| N20                       | 1.0                        | 0.013752                         | 0.673958                      | 0.144489 | Biso | 1.000000 | N |
| N21                       | 1.0                        | 0.158406                         | 0.673135                      | 0.218564 | Biso | 1.000000 | N |
| N22                       | 1.0                        | 0.012076                         | 0.839784                      | 0.138101 | Biso | 1.000000 | N |
| N23                       | 1.0                        | 0.169685                         | 0.837893                      | 0.181597 | Biso | 1.000000 | N |
| N24                       | 1.0                        | 0.325751                         | 0.836410                      | 0.229153 | Biso | 1.000000 | N |
| N25                       | 1.0                        | 0.500917                         | 0.499206                      | 0.191617 | Biso | 1.000000 | N |
| N26                       | 1.0                        | 0.669702                         | 0.997048                      | 0.225177 | Biso | 1.000000 | N |
| N27                       | 1.0                        | 0.836443                         | 0.001947                      | 0.202786 | Biso | 1.000000 | N |
| N28                       | 1.0                        | 0.505749                         | 0.672501                      | 0.198940 | Biso | 1.000000 | N |
| N29                       | 1.0                        | 0.670822                         | 0.670012                      | 0.197048 | Biso | 1.000000 | N |
| N30                       | 1.0                        | 0.506270                         | 0.837001                      | 0.189352 | Biso | 1.000000 | N |
| N31                       | 1.0                        | 0.671328                         | 0.836899                      | 0.185952 | Biso | 1.000000 | N |
| N32                       | 1.0                        | 0.836189                         | 0.835219                      | 0.190927 | Biso | 1.000000 | N |
| C1                        | 1.0                        | 0.060373                         | 0.120229                      | 0.148698 | Biso | 1.000000 | C |
| C2                        | 1.0                        | 0.055020                         | 0.278414                      | 0.148049 | Biso | 1.000000 | C |
| C3                        | 1.0                        | 0.226258                         | 0.277025                      | 0.153656 | Biso | 1.000000 | C |
| C4                        | 1.0                        | 0.058010                         | 0.439020                      | 0.175205 | Biso | 1.000000 | C |
| C5                        | 1.0                        | 0.217811                         | 0.434330                      | 0.199329 | Biso | 1.000000 | C |
| C6                        | 1.0                        | 0.382729                         | 0.436682                      | 0.185382 | Biso | 1.000000 | C |
| C7                        | 1.0                        | 0.562142                         | 0.121755                      | 0.214343 | Biso | 1.000000 | C |
| C8                        | 1.0                        | 0.558300                         | 0.280208                      | 0.222071 | Biso | 1.000000 | C |



|     |     |          |          |          |      |          |    |
|-----|-----|----------|----------|----------|------|----------|----|
| C9  | 1.0 | 0.723878 | 0.276946 | 0.191720 | Biso | 1.000000 | C  |
| C10 | 1.0 | 0.560219 | 0.438425 | 0.193064 | Biso | 1.000000 | C  |
| C11 | 1.0 | 0.720500 | 0.442552 | 0.170880 | Biso | 1.000000 | C  |
| C12 | 1.0 | 0.880159 | 0.440053 | 0.175105 | Biso | 1.000000 | C  |
| C13 | 1.0 | 0.059373 | 0.621390 | 0.178550 | Biso | 1.000000 | C  |
| C14 | 1.0 | 0.060709 | 0.781871 | 0.153712 | Biso | 1.000000 | C  |
| C15 | 1.0 | 0.220993 | 0.783689 | 0.209339 | Biso | 1.000000 | C  |
| C16 | 1.0 | 0.063601 | 0.943919 | 0.163390 | Biso | 1.000000 | C  |
| C17 | 1.0 | 0.226515 | 0.951943 | 0.186786 | Biso | 1.000000 | C  |
| C18 | 1.0 | 0.382238 | 0.944386 | 0.210732 | Biso | 1.000000 | C  |
| C19 | 1.0 | 0.563429 | 0.618723 | 0.195318 | Biso | 1.000000 | C  |
| C20 | 1.0 | 0.559510 | 0.782391 | 0.190243 | Biso | 1.000000 | C  |
| C21 | 1.0 | 0.728557 | 0.778730 | 0.192505 | Biso | 1.000000 | C  |
| C22 | 1.0 | 0.563199 | 0.943131 | 0.208548 | Biso | 1.000000 | C  |
| C23 | 1.0 | 0.728399 | 0.950088 | 0.205312 | Biso | 1.000000 | C  |
| C24 | 1.0 | 0.885766 | 0.944164 | 0.185398 | Biso | 1.000000 | C  |
| Co1 | 1.0 | 0.230738 | 0.614895 | 0.279671 | Biso | 1.000000 | Co |
| Ni1 | 1.0 | 0.388613 | 0.617824 | 0.276751 | Biso | 1.000000 | Ni |
| H1  | 1.0 | 0.300452 | 0.577734 | 0.345960 | Biso | 1.000000 | H  |
| H2  | 1.0 | 0.426929 | 0.716392 | 0.326357 | Biso | 1.000000 | H  |

### 3H-adsorption on Co-Ni/*gh*-C<sub>3</sub>N<sub>4</sub>

=====

# CRYSTAL DATA

-----

data\_VESTA\_phase\_1

|                           |                                           |
|---------------------------|-------------------------------------------|
| _chemical_name_common     | '3H-adsorption on Co-Ni/ <i>gh</i> -C3N4' |
| _cell_length_a            | 14.26550                                  |
| _cell_length_b            | 14.26550                                  |
| _cell_length_c            | 20.00000                                  |
| _cell_angle_alpha         | 90                                        |
| _cell_angle_beta          | 90                                        |
| _cell_angle_gamma         | 120                                       |
| _space_group_name_H-M_alt | 'P 1'                                     |
| _space_group_IT_number    | 1                                         |

loop\_

\_space\_group\_symop\_operation\_xyz

'x, y, z'

loop\_

\_atom\_site\_label

\_atom\_site\_occupancy

\_atom\_site\_fract\_x

\_atom\_site\_fract\_y

\_atom\_site\_fract\_z

\_atom\_site\_adp\_type

\_atom\_site\_B\_iso\_or\_equiv

\_atom\_site\_type\_symbol

|     |     |          |           |          |      |          |   |
|-----|-----|----------|-----------|----------|------|----------|---|
| N1  | 1.0 | 0.003182 | 0.000377  | 0.303525 | Biso | 1.000000 | N |
| N2  | 1.0 | 0.171813 | -0.000905 | 0.306790 | Biso | 1.000000 | N |
| N3  | 1.0 | 0.335788 | 0.996301  | 0.310065 | Biso | 1.000000 | N |
| N4  | 1.0 | 0.005678 | 0.166394  | 0.332625 | Biso | 1.000000 | N |
| N5  | 1.0 | 0.168492 | 0.176742  | 0.292187 | Biso | 1.000000 | N |
| N6  | 1.0 | 0.001442 | 0.330157  | 0.342922 | Biso | 1.000000 | N |
| N7  | 1.0 | 0.167605 | 0.334884  | 0.324728 | Biso | 1.000000 | N |
| N8  | 1.0 | 0.335266 | 0.341316  | 0.305320 | Biso | 1.000000 | N |
| N9  | 1.0 | 0.503444 | 0.001615  | 0.331236 | Biso | 1.000000 | N |
| N10 | 1.0 | 0.668684 | 0.997957  | 0.309020 | Biso | 1.000000 | N |
| N11 | 1.0 | 0.831192 | 0.995209  | 0.292898 | Biso | 1.000000 | N |
| N12 | 1.0 | 0.506282 | 0.168230  | 0.357549 | Biso | 1.000000 | N |
| N13 | 1.0 | 0.664088 | 0.175776  | 0.311280 | Biso | 1.000000 | N |
| N14 | 1.0 | 0.501371 | 0.331722  | 0.359801 | Biso | 1.000000 | N |
| N15 | 1.0 | 0.666934 | 0.335878  | 0.343118 | Biso | 1.000000 | N |
| N16 | 1.0 | 0.829522 | 0.341787  | 0.313217 | Biso | 1.000000 | N |
| N17 | 1.0 | 0.000337 | 0.500222  | 0.340498 | Biso | 1.000000 | N |
| N18 | 1.0 | 0.167431 | 0.494590  | 0.355847 | Biso | 1.000000 | N |
| N19 | 1.0 | 0.329533 | 0.489048  | 0.356587 | Biso | 1.000000 | N |
| N20 | 1.0 | 0.009624 | 0.667207  | 0.305862 | Biso | 1.000000 | N |
| N21 | 1.0 | 0.159578 | 0.676342  | 0.364882 | Biso | 1.000000 | N |
| N22 | 1.0 | 0.008306 | 0.832403  | 0.291260 | Biso | 1.000000 | N |
| N23 | 1.0 | 0.168371 | 0.834912  | 0.324218 | Biso | 1.000000 | N |
| N24 | 1.0 | 0.328974 | 0.839936  | 0.357799 | Biso | 1.000000 | N |
| N25 | 1.0 | 0.502878 | 0.499532  | 0.343086 | Biso | 1.000000 | N |
| N26 | 1.0 | 0.668271 | 0.498489  | 0.364278 | Biso | 1.000000 | N |
| N27 | 1.0 | 0.833050 | 0.496235  | 0.363111 | Biso | 1.000000 | N |
| N28 | 1.0 | 0.514935 | 0.675606  | 0.357667 | Biso | 1.000000 | N |
| N29 | 1.0 | 0.667409 | 0.667348  | 0.318621 | Biso | 1.000000 | N |
| N30 | 1.0 | 0.509323 | 0.836586  | 0.342113 | Biso | 1.000000 | N |
| N31 | 1.0 | 0.670567 | 0.834092  | 0.321947 | Biso | 1.000000 | N |
| N32 | 1.0 | 0.834099 | 0.832871  | 0.316593 | Biso | 1.000000 | N |
| C1  | 1.0 | 0.062344 | 0.121185  | 0.309447 | Biso | 1.000000 | C |

|     |     |          |          |          |      |          |    |
|-----|-----|----------|----------|----------|------|----------|----|
| C2  | 1.0 | 0.053067 | 0.274362 | 0.333943 | Biso | 1.000000 | C  |
| C3  | 1.0 | 0.225454 | 0.281616 | 0.306517 | Biso | 1.000000 | C  |
| C4  | 1.0 | 0.056516 | 0.437994 | 0.345030 | Biso | 1.000000 | C  |
| C5  | 1.0 | 0.221795 | 0.441056 | 0.344594 | Biso | 1.000000 | C  |
| C6  | 1.0 | 0.383704 | 0.438934 | 0.333679 | Biso | 1.000000 | C  |
| C7  | 1.0 | 0.561597 | 0.122450 | 0.333157 | Biso | 1.000000 | C  |
| C8  | 1.0 | 0.554359 | 0.276633 | 0.354302 | Biso | 1.000000 | C  |
| C9  | 1.0 | 0.721761 | 0.282716 | 0.321985 | Biso | 1.000000 | C  |
| C10 | 1.0 | 0.560618 | 0.440072 | 0.355458 | Biso | 1.000000 | C  |
| C11 | 1.0 | 0.724545 | 0.447364 | 0.357587 | Biso | 1.000000 | C  |
| C12 | 1.0 | 0.880108 | 0.442284 | 0.338662 | Biso | 1.000000 | C  |
| C13 | 1.0 | 0.058302 | 0.619917 | 0.336311 | Biso | 1.000000 | C  |
| C14 | 1.0 | 0.057387 | 0.776203 | 0.306366 | Biso | 1.000000 | C  |
| C15 | 1.0 | 0.222009 | 0.784794 | 0.349053 | Biso | 1.000000 | C  |
| C16 | 1.0 | 0.063454 | 0.940474 | 0.300827 | Biso | 1.000000 | C  |
| C17 | 1.0 | 0.227227 | 0.947706 | 0.313146 | Biso | 1.000000 | C  |
| C18 | 1.0 | 0.383068 | 0.942395 | 0.333307 | Biso | 1.000000 | C  |
| C19 | 1.0 | 0.565372 | 0.619168 | 0.338836 | Biso | 1.000000 | C  |
| C20 | 1.0 | 0.562596 | 0.782891 | 0.340011 | Biso | 1.000000 | C  |
| C21 | 1.0 | 0.726784 | 0.776511 | 0.319047 | Biso | 1.000000 | C  |
| C22 | 1.0 | 0.564395 | 0.943493 | 0.326953 | Biso | 1.000000 | C  |
| C23 | 1.0 | 0.725649 | 0.946438 | 0.307182 | Biso | 1.000000 | C  |
| C24 | 1.0 | 0.883673 | 0.939978 | 0.304697 | Biso | 1.000000 | C  |
| Co1 | 1.0 | 0.231255 | 0.620697 | 0.413335 | Biso | 1.000000 | Co |
| Ni1 | 1.0 | 0.389124 | 0.619256 | 0.409575 | Biso | 1.000000 | Ni |
| H1  | 1.0 | 0.291966 | 0.575132 | 0.461467 | Biso | 1.000000 | H  |
| H2  | 1.0 | 0.428588 | 0.713787 | 0.451943 | Biso | 1.000000 | H  |
| H3  | 1.0 | 0.256177 | 0.696182 | 0.470382 | Biso | 1.000000 | H  |

## H<sub>2</sub> adsorption on Co-Ni/gh-C<sub>3</sub>N<sub>4</sub>

#=====

# CRYSTAL DATA

#-----

data\_VESTA\_phase\_1

|                       |                                  |
|-----------------------|----------------------------------|
| _chemical_name_common | 'H2 adsorption on Co-Ni/gh-C3N4' |
| _cell_length_a        | 14.26550                         |
| _cell_length_b        | 14.26550                         |
| _cell_length_c        | 20.00000                         |

|                           |       |
|---------------------------|-------|
| _cell_angle_alpha         | 90    |
| _cell_angle_beta          | 90    |
| _cell_angle_gamma         | 120   |
| _space_group_name_H-M_alt | 'P 1' |
| _space_group_IT_number    | 1     |

loop\_

|                                  |           |
|----------------------------------|-----------|
| _space_group_symop_operation_xyz | 'x, y, z' |
|----------------------------------|-----------|

loop\_

| _atom_site_label | _atom_site_occupancy | _atom_site_fract_x | _atom_site_fract_y | _atom_site_fract_z | _atom_site_adp_type | _atom_site_B_iso_or_equiv | _atom_site_type_symbol |
|------------------|----------------------|--------------------|--------------------|--------------------|---------------------|---------------------------|------------------------|
| N1               | 1.0                  | 0.004046           | 0.002398           | 0.168436           | Biso                | 1.000000                  | N                      |
| N2               | 1.0                  | 0.154211           | 0.479935           | 0.220959           | Biso                | 1.000000                  | N                      |
| N3               | 1.0                  | 0.324186           | 0.488999           | 0.214286           | Biso                | 1.000000                  | N                      |
| N4               | 1.0                  | 0.003196           | 0.169465           | 0.142090           | Biso                | 1.000000                  | N                      |
| N5               | 1.0                  | 0.171142           | 0.171428           | 0.146954           | Biso                | 1.000000                  | N                      |
| N6               | 1.0                  | 0.009679           | 0.340107           | 0.143507           | Biso                | 1.000000                  | N                      |
| N7               | 1.0                  | 0.164853           | 0.328288           | 0.177377           | Biso                | 1.000000                  | N                      |
| N8               | 1.0                  | 0.335598           | 0.339592           | 0.158142           | Biso                | 1.000000                  | N                      |
| N9               | 1.0                  | 0.501914           | 0.000132           | 0.213779           | Biso                | 1.000000                  | N                      |
| N10              | 1.0                  | 0.658927           | 0.489801           | 0.163886           | Biso                | 1.000000                  | N                      |
| N11              | 1.0                  | 0.827383           | 0.495754           | 0.164236           | Biso                | 1.000000                  | N                      |
| N12              | 1.0                  | 0.509166           | 0.173236           | 0.240802           | Biso                | 1.000000                  | N                      |
| N13              | 1.0                  | 0.664851           | 0.168717           | 0.191570           | Biso                | 1.000000                  | N                      |
| N14              | 1.0                  | 0.508054           | 0.339834           | 0.231547           | Biso                | 1.000000                  | N                      |
| N15              | 1.0                  | 0.666000           | 0.333426           | 0.197149           | Biso                | 1.000000                  | N                      |
| N16              | 1.0                  | 0.830881           | 0.332774           | 0.189455           | Biso                | 1.000000                  | N                      |
| N17              | 1.0                  | 0.999220           | 0.500141           | 0.179135           | Biso                | 1.000000                  | N                      |
| N18              | 1.0                  | 0.170612           | 0.000344           | 0.185786           | Biso                | 1.000000                  | N                      |
| N19              | 1.0                  | 0.336611           | 0.999915           | 0.189484           | Biso                | 1.000000                  | N                      |
| N20              | 1.0                  | 0.014879           | 0.673210           | 0.143952           | Biso                | 1.000000                  | N                      |
| N21              | 1.0                  | 0.156484           | 0.672211           | 0.222351           | Biso                | 1.000000                  | N                      |
| N22              | 1.0                  | 0.013110           | 0.839230           | 0.138956           | Biso                | 1.000000                  | N                      |
| N23              | 1.0                  | 0.170556           | 0.836497           | 0.182130           | Biso                | 1.000000                  | N                      |
| N24              | 1.0                  | 0.325917           | 0.834311           | 0.231780           | Biso                | 1.000000                  | N                      |
| N25              | 1.0                  | 0.500970           | 0.501336           | 0.192978           | Biso                | 1.000000                  | N                      |

|     |     |          |          |          |      |             |
|-----|-----|----------|----------|----------|------|-------------|
| N26 | 1.0 | 0.670201 | 0.995760 | 0.226719 | Biso | 1.000000 N  |
| N27 | 1.0 | 0.839530 | 0.002499 | 0.208721 | Biso | 1.000000 N  |
| N28 | 1.0 | 0.511563 | 0.675674 | 0.176268 | Biso | 1.000000 N  |
| N29 | 1.0 | 0.671921 | 0.670953 | 0.205069 | Biso | 1.000000 N  |
| N30 | 1.0 | 0.509492 | 0.837117 | 0.181929 | Biso | 1.000000 N  |
| N31 | 1.0 | 0.676743 | 0.839213 | 0.184922 | Biso | 1.000000 N  |
| N32 | 1.0 | 0.839315 | 0.835388 | 0.197542 | Biso | 1.000000 N  |
| C1  | 1.0 | 0.061669 | 0.119326 | 0.153102 | Biso | 1.000000 C  |
| C2  | 1.0 | 0.053963 | 0.276153 | 0.152925 | Biso | 1.000000 C  |
| C3  | 1.0 | 0.226410 | 0.276932 | 0.159466 | Biso | 1.000000 C  |
| C4  | 1.0 | 0.055177 | 0.436520 | 0.179708 | Biso | 1.000000 C  |
| C5  | 1.0 | 0.214941 | 0.432017 | 0.204297 | Biso | 1.000000 C  |
| C6  | 1.0 | 0.382711 | 0.440158 | 0.187838 | Biso | 1.000000 C  |
| C7  | 1.0 | 0.561430 | 0.121145 | 0.215273 | Biso | 1.000000 C  |
| C8  | 1.0 | 0.557017 | 0.279941 | 0.224054 | Biso | 1.000000 C  |
| C9  | 1.0 | 0.722772 | 0.276849 | 0.192882 | Biso | 1.000000 C  |
| C10 | 1.0 | 0.559128 | 0.438873 | 0.196075 | Biso | 1.000000 C  |
| C11 | 1.0 | 0.719790 | 0.443308 | 0.174602 | Biso | 1.000000 C  |
| C12 | 1.0 | 0.879104 | 0.440052 | 0.177521 | Biso | 1.000000 C  |
| C13 | 1.0 | 0.058432 | 0.620201 | 0.180214 | Biso | 1.000000 C  |
| C14 | 1.0 | 0.061903 | 0.781166 | 0.153629 | Biso | 1.000000 C  |
| C15 | 1.0 | 0.220761 | 0.782233 | 0.211714 | Biso | 1.000000 C  |
| C16 | 1.0 | 0.065352 | 0.943278 | 0.164516 | Biso | 1.000000 C  |
| C17 | 1.0 | 0.228396 | 0.950670 | 0.185487 | Biso | 1.000000 C  |
| C18 | 1.0 | 0.383336 | 0.942233 | 0.210855 | Biso | 1.000000 C  |
| C19 | 1.0 | 0.565771 | 0.620466 | 0.191021 | Biso | 1.000000 C  |
| C20 | 1.0 | 0.566350 | 0.785524 | 0.179855 | Biso | 1.000000 C  |
| C21 | 1.0 | 0.731814 | 0.779253 | 0.196508 | Biso | 1.000000 C  |
| C22 | 1.0 | 0.564561 | 0.942753 | 0.207231 | Biso | 1.000000 C  |
| C23 | 1.0 | 0.731695 | 0.951259 | 0.208006 | Biso | 1.000000 C  |
| C24 | 1.0 | 0.888798 | 0.944419 | 0.190682 | Biso | 1.000000 C  |
| Co1 | 1.0 | 0.223015 | 0.608513 | 0.278247 | Biso | 1.000000 Co |
| Ni1 | 1.0 | 0.370758 | 0.638108 | 0.208065 | Biso | 1.000000 Ni |
| H1  | 1.0 | 0.302962 | 0.613332 | 0.458623 | Biso | 1.000000 H  |
| H2  | 1.0 | 0.304642 | 0.620533 | 0.505315 | Biso | 1.000000 H  |

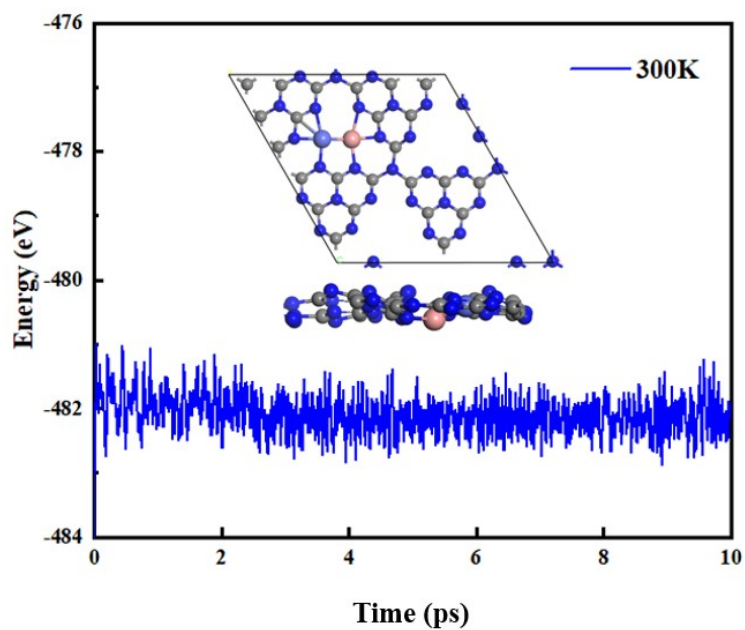

**Fig. S1** Molecular dynamic simulation of Ni-Co/*gh*-C<sub>3</sub>N<sub>4</sub> monolayer at 300 K. Insets show the top and side views of atomic structures of Ni-Co/*gh*-C<sub>3</sub>N<sub>4</sub> monolayer after AIMD run. Blue, gray, purple and pink balls represent N, C, Co and Ni atoms, respectively.
